# Supplementary material for: Metronomic gemcitabine suppresses tumour growth, improves perfusion, and reduces hypoxia in human pancreatic ductal adenocarcinoma
Source: PubMed Central journal article supplement (PMC2905290; doi:10.1038/sj.bjc.6605727), 2010-06-08
Supplement: 6605727x1.pdf [file 6605727x1.pdf]

**Table S1** Fold changes of soluble factors after maximum tolerated dose (MTD) gemcitabine (Gem) or metronomic gemcitabine treatment compared to vehicle control in the two primary pancreatic cancer xenografts.

| Soluble factors                 | PaCa8   |                | Soluble factors                 | PaCa13  |                |
|---------------------------------|---------|----------------|---------------------------------|---------|----------------|
|                                 | MTD Gem | Metronomic Gem |                                 | MTD Gem | Metronomic Gem |
| Adiponectin                     | ↑ 15    | --             | Adiponectin                     | ↓ 4.7   | --             |
| Alpha-1 antitrypsin             | ↓ 17    | ↓ 32           | Alpha-fetoprotein               | ↑ 2.0   | --             |
| Alpha-fetoprotein               | ↓ 2.0   | ↓ 1.9          | Alpha-2 macroglobulin           | ↑ 4.5   | --             |
| Alpha-2 macroglobulin           | --      | ↑ 1.5          | Apolipoprotein H                | ↑ 1.8   | --             |
| Apolipoprotein H                | --      | ↑ 2.0          | Beta-2 macroglobulin            | ↓ 8.3   | ↓ 3.6          |
| Beta-2 macroglobulin            | ↓ 4.5   | ↓ 22           | Cancer antigen 125              | --      | ↓ 1.9          |
| BDNF                            | --      | ↓ 4.7          | Calcitonin                      | ↑ 3.6   | BDL            |
| Cancer antigen 125              | ↓ 2.4   | ↓ 11           | C-reactive protein              | BDL     | ↓ 4.5          |
| CD40                            | ↓ 8.8   | ↓ 63           | Eotaxin                         | ↑ 3.7   | --             |
| CD40 ligand                     | ↓ 6.0   | ↓ 21           | Factor VII                      | ↓ 4.0   | --             |
| Epidermal growth factor         | ↓ 4.1   | ↓ 12           | Fibroblast growth factor, basic | ↑ 2.9   | --             |
| Endothelin-1                    | ↓ 2.4   | ↓ 4.8          | GM-CSF                          | ↑ 3.0   | --             |
| Fatty acid binding protein      | --      | ↓ 54           | Glutathione-S-transferase       | ↓ 2.4   | --             |
| Factor VII                      | ↓ 1.9   | --             | ICAM-1                          | ↑ 1.8   | ↓ 1.8          |
| Ferritin                        | --      | ↓ 11           | Interferon gamma                | ↑ 3.0   | --             |
| Fibroblast growth factor, basic | ↑ 2.9   | --             | Interleukin-1 alpha             | ↑ 2.4   | --             |
| G-CSF                           | ↓ 14    | BDL            | Interleukin-1 ra                | ↓ 2.4   | ↓ 2.4          |
| GM-CSF                          | ↓ 20    | ↓ 34           | Interleukin-12 p70              | ↑ 1.7   | --             |
| Glutathione-S-transferase       | --      | ↑ 1.7          | Interleukin-15                  | ↑ 1.9   | --             |
| ICAM-1                          | ↓ 15    | ↓ 57           | Interleukin-16                  | ↑ 4.1   | ↑ 2.5          |
| IgM globulin E                  | ↓ 4.0   | ↑ 1.5          | Interleukin-4                   | ↑ 3.2   | --             |
| Interferon gamma                | ↓ 16    | BDL            | Interleukin-5                   | ↓ 2.2   | --             |
| Interleukin-1 alpha             | ↓ 75    | ↓ 397          | Leptin                          | ↓ 2.0   | ↓ 1.3          |
| Interleukin-1 beta              | ↓ 19    | ↓ 20           | Lipoprotein a                   | BDL     | ↓ 2.3          |
| Interleukin-1 ra                | ↓ 2.8   | ↓ 35           | MCP-1                           | ↑ 4.1   | BDL            |
| Interleukin-10                  | BDL     | ↓ 2.0          | MMP-3                           | ↓ 1.7   | --             |
| Interleukin-12 p70              | --      | ↑ 1.7          | Myeloperoxidase                 | ↑ 2.6   | --             |
| Interleukin-13                  | --      | ↑ 1.6          | PAI-1                           | ↓ 2.8   | ↓ 5.1          |
| Interleukin-15                  | ↓ 2.4   | --             | Stem cell factor                | ↑ 3.2   | --             |
| Interleukin-2                   | --      | BDL            | SGOT                            | ↑ 2.0   | --             |
| Interleukin-3                   | BDL     | BDL            | Tissue factor                   | ↑ 11    | --             |
| Interleukin-4                   | ↓ 2.4   | --             | Tumor necrosis factor-alpha     | ↑ 3.2   | --             |
| Interleukin-5                   | --      | BDL            | Tumor necrosis factor-beta      | ↑ 2.3   | --             |
| Interleukin-6                   | ↓ 9.7   | BDL            | Tumor necrosis factor RII       | ↓ 2.1   | ↓ 3.8          |
| Interleukin-8                   | ↓ 18    | ↓ 189          | Thrombopoietin                  | ↑ 1.7   | --             |
| Insulin                         | --      | ↑ 13           | Thyroid stimulating hormone     | ↑ 2.0   | --             |
| Lipoprotein a                   | ↓ 2.4   | BDL            | VCAM-1                          | ↓ 1.9   | ↓ 8.9          |
| MCP-1                           | ↓ 30    | ↓ 81           | von Willebrand factor           | ↓ 1.7   | ↓ 2.4          |
| MDC                             | ↓ 4.2   | BDL            |                                 |         |                |
| MIP-1 alpha                     | --      | ↑ 1.5          |                                 |         |                |
| Prostatic acid phosphatase      | ↓ 5.3   | ↓ 12           |                                 |         |                |
| PAPP-A                          | ↓ 4.0   | --             |                                 |         |                |
| Stem cell factor                | ↓ 2.5   | ↓ 7.6          |                                 |         |                |
| SGOT                            | ↑ 2.7   | --             |                                 |         |                |

--, no significant change compared to vehicle control.  
 ↑, significant increase (P<0.05) compared to vehicle control.  
 ↓, significant decrease (P<0.05) compared to vehicle control.  
 BDL, below detection limit.

Note: For the complete list of 89 human antigens/soluble factors that were quantified using the HumanMAP version 1.6, refer to [http://www.rulesbasedmedicine.com/services\\_human\\_antigen.asp](http://www.rulesbasedmedicine.com/services_human_antigen.asp). Only those soluble factors whose levels were significantly altered by at least one of the treatment regimens were listed above.
